# Supplementary material for: Time-limited trials (TLT) in the intensive care unit: Recommendations from the ethics section of the DIVI and the ethics section of the DGIIN
Source: Med Klin Intensivmed Notfmed. 2024 Feb 12;119(4):291–5. [Article in German] doi: 10.1007/s00063-024-01112-4 (PMC11059002; doi:10.1007/s00063-024-01112-4)
Supplement: Supplementary file 1 [file 63_2024_1112_MOESM1_ESM.pdf]

## TLT -Fallbeispiel Chirurgie

|                                                                                                                                             |                                                                                                                                                                                                                                                                                                                                                                                                                                                                                                                                                                                                                                                                                                                                                                                                                                                                                                                                                                                                                 |
|---------------------------------------------------------------------------------------------------------------------------------------------|-----------------------------------------------------------------------------------------------------------------------------------------------------------------------------------------------------------------------------------------------------------------------------------------------------------------------------------------------------------------------------------------------------------------------------------------------------------------------------------------------------------------------------------------------------------------------------------------------------------------------------------------------------------------------------------------------------------------------------------------------------------------------------------------------------------------------------------------------------------------------------------------------------------------------------------------------------------------------------------------------------------------|
| <b>Knappe Beschreibung der individuellen Ausgangssituation</b> , Anlass, Beteiligte (interdisziplinär, interprofessionell, patientenseitig) | <p>Patientin mit nekrotisierender Pankreatitis, multiple bislang kompensierte kardiale Vorerkrankungen</p> <p>Zwei Monate intensivmedizinische Behandlung mit rezidivierenden septischen Schüben</p> <p>Phasen der TAA, Kardioversion, Implantation eines passageren externen Schrittmachers</p> <p>Prolongiertes Beatmungswaning – Tracheotomie</p> <p>Offene Bauchbehandlung bei multiplen Darm-, Pankreas-Fisteln, Parenterale Ernährung, nach Etablierung eines stabilen Fistelsystems wäre nach erfolgter Genesung ein plastisch-rekonstruktiver Bauchdeckenverschluss notwendig</p> <p>akut auf chronisches Nierenversagen – umtägige Dialyse</p> <p>Erhöhte Transaminasen, Bilirubin 15mg/dl - undulierend, Gerinnung mäßig eingeschränkt</p> <p>Thrombosen in V. jugularis interna beidseits, ZVK/Shaldon -Anlagen gestalten sich zunehmend schwierig</p> <p><b>Aktuell:</b> Erneuter septischer Schub mit weiteren Nekrosestraßen (CT), erneute Vigilanzminderung, erneute kardiale Dekompensation</p> |
| <b>Begründung für das TLT</b> , (ggf. Verweis auf ethische Fallbesprechung)                                                                 | <p>Im Gesamtkontext nahezu aussichtslose Situation</p>                                                                                                                                                                                                                                                                                                                                                                                                                                                                                                                                                                                                                                                                                                                                                                                                                                                                                                                                                          |
| <b>Festlegen der Kriterien</b> , an denen der Erfolg/Misserfolg des TLT im individuellen Fall bemessen wird                                 | <p>kardiale Rekompensation, Katecholaminbedarf, Verlauf Infektparameter, Verlauf Leberwerte- Gerinnung, Laktatverlauf</p>                                                                                                                                                                                                                                                                                                                                                                                                                                                                                                                                                                                                                                                                                                                                                                                                                                                                                       |
| <b>Dauer des TLT</b>                                                                                                                        | <p>5 Tage</p>                                                                                                                                                                                                                                                                                                                                                                                                                                                                                                                                                                                                                                                                                                                                                                                                                                                                                                                                                                                                   |
| <b>Festlegen des Zeitpunktes für ein erneutes strukturiertes Angehörigengespräch</b>                                                        | <p>In 5 Tagen</p>                                                                                                                                                                                                                                                                                                                                                                                                                                                                                                                                                                                                                                                                                                                                                                                                                                                                                                                                                                                               |
| <b>Behandlungsoptionen</b>                                                                                                                  | <p>Da eine erneute interventionelle Drainage technisch unmöglich ist, nach kardialer Stabilisierung chirurgische Nekrosektomie als Ultima Ratio, ggf. Umstellung der Antibiose nach Befund, differenzierte Volumen- und Katecholamintherapie für den Zeitraum des TLT.</p>                                                                                                                                                                                                                                                                                                                                                                                                                                                                                                                                                                                                                                                                                                                                      |
| <b>geltende Therapiebegrenzungen</b> ,                                                                                                      | <p>Keine ECMO, Keine CPR</p>                                                                                                                                                                                                                                                                                                                                                                                                                                                                                                                                                                                                                                                                                                                                                                                                                                                                                                                                                                                    |
| <b>Einbindung von palliativmedizinischen Teams</b>                                                                                          | <p>Beginn palliativmedizinische Mitbehandlung</p>                                                                                                                                                                                                                                                                                                                                                                                                                                                                                                                                                                                                                                                                                                                                                                                                                                                                                                                                                               |
| <b>Tägliche Re-Evaluation</b> der Situation                                                                                                 |                                                                                                                                                                                                                                                                                                                                                                                                                                                                                                                                                                                                                                                                                                                                                                                                                                                                                                                                                                                                                 |
| <b>Entscheidung</b> im Verlauf oder zum vereinbarten Ende des TLT im Team-Konsens                                                           | <p><b>Verbesserung:</b> → Therapie fortführen</p> <p><b>Keine Änderung/Verschlechterung</b> der klinischen Situation: →Therapiezieländerung</p>                                                                                                                                                                                                                                                                                                                                                                                                                                                                                                                                                                                                                                                                                                                                                                                                                                                                 |

## Fallbeispiel Innere Medizin

|                                                                                                                                             |                                                                                                                                                                                                                                                                                                                                                                                                                                                                                                                                                                                              |
|---------------------------------------------------------------------------------------------------------------------------------------------|----------------------------------------------------------------------------------------------------------------------------------------------------------------------------------------------------------------------------------------------------------------------------------------------------------------------------------------------------------------------------------------------------------------------------------------------------------------------------------------------------------------------------------------------------------------------------------------------|
| <b>Knappe Beschreibung der individuellen Ausgangssituation</b> , Anlass, Beteiligte (interdisziplinär, interprofessionell, patientenseitig) | <p>Patient mit Rezidiv einer malignen hämatologischen Erkrankung, Knochenkarzinose, palliative Situation mit unklarer Lebenszeit unter erneuter Chemotherapie</p> <p><b>Intensivstation:</b> Intubiert, invasiv beatmet, bei enoraler Blutung, Sediert, presst, mehrfach kurze Reanimation im Rahmen von Hypoxiephasen hochdosiert Katecholamine, Sepsis, ANV, Leberversagen</p> <p>aktuell ist eine Chemotherapie als palliative Behandlung der Grunderkrankung nicht möglich</p> <p><b>aktuell:</b> erneute Sepsis bei Pneumonie, Verschlechterung der Beatmungssituation Panzytopenie</p> |
| <b>Begründung für das TLT</b> , (ggf. Verweis auf ethische Fallbesprechung)                                                                 | <p>Nahezu Aussichtslosigkeit auf Heilung</p> <p>Eine Therapie der Grunderkrankung ist nicht möglich</p> <p>ggf. falls Stabilisierung ist eine Chemotherapie möglich, aber weiterhin schlechte Prognose mit unklarer Lebenszeit, mit Risiko der erneuten Immunsuppression und Sepsis</p>                                                                                                                                                                                                                                                                                                      |
| <b>Festlegen der Kriterien</b> , an denen der Erfolg/Misserfolg des TLT im individuellen Fall bemessen wird                                 | <p>Verlauf:</p> <ul style="list-style-type: none"> <li>- Katecholaminbedarf,</li> <li>- Infektparameter,</li> <li>- Leberwerte- Gerinnung,</li> <li>- Laktatverlauf</li> </ul>                                                                                                                                                                                                                                                                                                                                                                                                               |
| <b>Dauer des TLT</b>                                                                                                                        | <p>5 Tage</p>                                                                                                                                                                                                                                                                                                                                                                                                                                                                                                                                                                                |
| <b>Festlegen des Zeitpunktes für ein erneutes strukturiertes Angehörigengespräch</b>                                                        | <p>In 5 Tagen</p>                                                                                                                                                                                                                                                                                                                                                                                                                                                                                                                                                                            |
| <b>Behandlungsoptionen</b> ,                                                                                                                | <p>Eskalation Antibiotikatherapie</p> <p>Invasive Beatmung, Lagerung,</p> <p>Transfusion,</p> <p>Granulozyten stimulierender Faktor (GCSF)</p>                                                                                                                                                                                                                                                                                                                                                                                                                                               |
| <b>geltende Therapiebegrenzungen</b> ,                                                                                                      | <p>keine ECMO, keine Reanimation</p>                                                                                                                                                                                                                                                                                                                                                                                                                                                                                                                                                         |
| <b>Einbindung von palliativmedizinischen Teams</b>                                                                                          | <p>Beginn palliativmedizinische Mitbehandlung</p>                                                                                                                                                                                                                                                                                                                                                                                                                                                                                                                                            |
| <b>Tägliche Re-Evaluation</b> der Situation                                                                                                 |                                                                                                                                                                                                                                                                                                                                                                                                                                                                                                                                                                                              |
| <b>Entscheidung</b> im Verlauf oder zum vereinbarten Ende des TLT im Team-Konsens                                                           | <p><b>Verbesserung:</b> → Therapie fortführen</p> <p><b>Keine Änderung/Verschlechterung</b> der klinischen Situation: → Therapiezieländerung</p>                                                                                                                                                                                                                                                                                                                                                                                                                                             |

TAA: Tachyarrhythmia absoluta

CT: Computertomografie

ECMO: Extracorporale Membranoxygenierung
